# Supplementary material for: Importance of reference group selection in the evaluation of cancer incidence
Source: Springer Nature journal article supplement (doi:10.1038/s41598-024-82555-9), 2025-01-02
Supplement: MOESM1 [file 41598_2024_82555_MOESM1_ESM.docx]

**Supplemental Material 1**. States/regions included in the SEER 21 database

| **States/Regions** |
| --- |
| Alaska Native Tumor Registry |
| Connecticut |
| Detroit |
| Atlanta |
| Greater Georgia |
| Rural Georgia |
| San Francisco - Oakland |
| San Jose - Monterey |
| Greater California |
| Hawaii |
| Idaho |
| Iowa |
| Kentucky |
| Los Angeles |
| Louisiana |
| Massachusetts |
| New Jersey |
| New Mexico |
| New York |
| Seattle - Puget Sound |
| Utah |

21 states/regions included in the SEER 21 database that are used in analyses for the US population. Data were extracted in 2019 for all primary cancers diagnosed between 1/1/2002 and 12/31/2015

**Supplemental Material 2.** P-values from likelihood ratio tests comparing nested models: 1 change-point vs. 0 change-point models and 2 change-point vs. 1 change-point models.

| **Cancer** | **Reference Group** | **p-value (1 vs 0 CP)** | **p-value (2 vs 1 CP)** |
| --- | --- | --- | --- |
| Prostate | WTC vs. NYC | 0.260 |  |
| WTC vs. NYS | 0.088 |  |
| WTC vs. US Pop | 0.017 | 0.203 |
| Lung | WTC vs. NYC | 0.193 |  |
| WTC vs. NYS | 0.218 |  |
| WTC vs. US Pop | 0.209 |  |
| Melanoma | WTC vs. NYC | 0.113 |  |
| WTC vs. NYS | 0.159 |  |
| WTC vs. US Pop | 0.057 |  |
| Colon | WTC vs. NYC | 0.211 |  |
| WTC vs. NYS | 0.228 |  |
| WTC vs. US Pop | 0.294 |  |
| Thyroid | WTC vs. NYC | 0.477 |  |
| WTC vs. NYS | 0.362 |  |
| WTC vs. US Pop | 0.231 |  |
| Non-Hodgkin's Lymphoma | WTC vs. NYC | 0.398 |  |
| WTC vs. NYS | 0.608 |  |
| WTC vs. US Pop | 0.599 |  |

**Abbreviations:** CP, change-point; WTC, World Trade Center; NYC, New York City; NYS, New York State; US, United States; SEER, Surveillance, Epidemiology, and End Results.

US population includes data from SEER 21, which encompasses 21 states/regions that are representative of the demographics of the US population.-2 Log likelihood goodness-of-fit statistics were obtained from 0 and 1-change-point models
